# Supplementary material for: FUS-induced circRHOBTB3 facilitates cell proliferation via miR-600/NACC1 mediated autophagy response in pancreatic ductal adenocarcinoma
Source: J Exp Clin Cancer Res. 2021 Aug 20;40:261. doi: 10.1186/s13046-021-02063-w (PMC8377879; doi:10.1186/s13046-021-02063-w)
Supplement: Supplementary file 3 — Additional file 3: Table S3. Fifty-seven candidate miRNAs targeted by circRHOBTB3 predicted by overlapping three miRNA target databases results. [file 13046_2021_2063_MOESM3_ESM.xlsx]

## Sheet: Sheet1
Table. S3. 57 candidate miRNAs targeted by circRHOBTB3 predicted by overlapping three miRNA target database results
Seq	miRNA	miRanda	RNAhybrid	TargetScan
hsa_circ:chr5:95091100-95099324	hsa-miR-4778-3p	1	1	1
hsa_circ:chr5:95091100-95099324	hsa-miR-619-3p	1	1	1
hsa_circ:chr5:95091100-95099324	hsa-miR-6744-3p	1	1	1
hsa_circ:chr5:95091100-95099324	hsa-miR-5572	1	1	1
hsa_circ:chr5:95091100-95099324	hsa-miR-16-5p	1	1	1
hsa_circ:chr5:95091100-95099324	hsa-miR-600	1	1	1
hsa_circ:chr5:95091100-95099324	hsa-miR-603	1	1	1
hsa_circ:chr5:95091100-95099324	hsa-miR-942-3p	1	1	1
hsa_circ:chr5:95091100-95099324	hsa-miR-195-5p	1	1	1
hsa_circ:chr5:95091100-95099324	hsa-miR-3120-3p	1	1	1
hsa_circ:chr5:95091100-95099324	hsa-miR-497-5p	1	1	1
hsa_circ:chr5:95091100-95099324	hsa-miR-298	1	1	1
hsa_circ:chr5:95091100-95099324	hsa-miR-4427	1	1	1
hsa_circ:chr5:95091100-95099324	hsa-miR-181a-2-3p	1	1	1
hsa_circ:chr5:95091100-95099324	hsa-miR-6838-5p	1	1	1
hsa_circ:chr5:95091100-95099324	hsa-miR-3170	1	1	1
hsa_circ:chr5:95091100-95099324	hsa-miR-8060	1	1	1
hsa_circ:chr5:95091100-95099324	hsa-miR-4296	1	1	1
hsa_circ:chr5:95091100-95099324	hsa-miR-6855-5p	1	1	1
hsa_circ:chr5:95091100-95099324	hsa-miR-3978	1	1	1
hsa_circ:chr5:95091100-95099324	hsa-miR-6759-5p	1	1	1
hsa_circ:chr5:95091100-95099324	hsa-miR-103a-3p	1	1	1
hsa_circ:chr5:95091100-95099324	hsa-miR-6757-3p	1	1	1
hsa_circ:chr5:95091100-95099324	hsa-miR-15b-5p	1	1	1
hsa_circ:chr5:95091100-95099324	hsa-miR-6128	1	1	1
hsa_circ:chr5:95091100-95099324	hsa-miR-922	1	1	1
hsa_circ:chr5:95091100-95099324	hsa-miR-1229-5p	1	1	1
hsa_circ:chr5:95091100-95099324	hsa-miR-5093	1	1	1
hsa_circ:chr5:95091100-95099324	hsa-miR-2355-5p	1	1	1
hsa_circ:chr5:95091100-95099324	hsa-miR-6769b-5p	1	1	1
hsa_circ:chr5:95091100-95099324	hsa-miR-1343-3p	1	1	1
hsa_circ:chr5:95091100-95099324	hsa-miR-6769a-5p	1	1	1
hsa_circ:chr5:95091100-95099324	hsa-miR-4757-5p	1	1	1
hsa_circ:chr5:95091100-95099324	hsa-miR-15a-5p	1	1	1
hsa_circ:chr5:95091100-95099324	hsa-miR-6868-5p	1	1	1
hsa_circ:chr5:95091100-95099324	hsa-miR-5682	1	1	1
hsa_circ:chr5:95091100-95099324	hsa-miR-656-5p	1	1	1
hsa_circ:chr5:95091100-95099324	hsa-miR-6742-3p	1	1	1
hsa_circ:chr5:95091100-95099324	hsa-miR-6861-5p	1	1	1
hsa_circ:chr5:95091100-95099324	hsa-miR-107	1	1	1
hsa_circ:chr5:95091100-95099324	hsa-miR-194-3p	1	1	1
hsa_circ:chr5:95091100-95099324	hsa-miR-4322	1	1	1
hsa_circ:chr5:95091100-95099324	hsa-miR-214-3p	1	1	1
hsa_circ:chr5:95091100-95099324	hsa-miR-4265	1	1	1
hsa_circ:chr5:95091100-95099324	hsa-miR-3940-5p	1	1	1
hsa_circ:chr5:95091100-95099324	hsa-miR-875-3p	1	1	1
hsa_circ:chr5:95091100-95099324	hsa-miR-4507	1	1	1
hsa_circ:chr5:95091100-95099324	hsa-miR-7978	1	1	1
hsa_circ:chr5:95091100-95099324	hsa-miR-6875-3p	1	1	1
hsa_circ:chr5:95091100-95099324	hsa-miR-3925-5p	1	1	1
hsa_circ:chr5:95091100-95099324	hsa-miR-4648	1	1	1
hsa_circ:chr5:95091100-95099324	hsa-miR-621	1	1	1
hsa_circ:chr5:95091100-95099324	hsa-miR-6783-3p	1	1	1
hsa_circ:chr5:95091100-95099324	hsa-miR-4697-3p	1	1	1
hsa_circ:chr5:95091100-95099324	hsa-miR-3919	1	1	1
hsa_circ:chr5:95091100-95099324	hsa-miR-6793-5p	1	1	1
hsa_circ:chr5:95091100-95099324	hsa-miR-6830-3p	1	1	1
